# Supplementary material for: Maternal Serum Vitamin B12 during Pregnancy and Offspring Autism Spectrum Disorder
Source: MDPI journal article supplement (doi:10.3390/nu15082009), 2023-04-21
Supplement: s1 [file s1]

## Maternal serum vitamin B12 during pregnancy and offspring Autism Spectrum Disorder

Andre Sourander <sup>1,2,\*†</sup>, Sanju Silwal <sup>1+</sup>, Heljä-Marja Surcel <sup>3,4</sup>, Susanna Hinkka-Yli-Salomäki <sup>1</sup>, Subina Upadhyaya <sup>1</sup>, Ian W. McKeague <sup>5</sup>, Keely Cheslack-Postava <sup>6</sup>, Alan S. Brown <sup>6,7</sup>

<sup>1</sup> Research Centre for Child Psychiatry, INVEST Flagship, University of Turku, 20014 Turku, Finland

<sup>2</sup> Department of Child Psychiatry, Turku University Hospital, 20521 Turku, Finland

<sup>3</sup> Faculty of Medicine, University of Oulu, 90014 Oulu, Finland

<sup>4</sup> Biobank Borealis of Northern Finland, Oulu University Hospital, 90014 Oulu, Finland

<sup>5</sup> Department of Biostatistics, Columbia University Mailman School of Public Health, New York, NY 10032, USA

<sup>6</sup> Department of Psychiatry, New York State Psychiatric Institute, Columbia University Irving Medical Center, New York, NY 10032, USA

<sup>7</sup> Department of Epidemiology, Columbia University Mailman School of Public Health, New York, NY 10032, USA

\* Correspondence: andsou@utu.fi; Tel.: +358-50-365-3447 or +358-2-333-7668 or +358-2-333-7394

† These authors contributed equally and share equal first authorship to this work.

## Supplement

**Table S1:** Review of previous studies on maternal vitamin B12 and multivitamin and autism spectrum disorders, by primary method of exposure assessment

| Author/<br>Country/            | Diagnosis | Study design                                                | Diagnostic criteria | Measures of exposure                                                                                             | Dosage | Sample size/Age range                                               | Covariates                                                                                                                                     | Results, Effect size estimate and 95% CI                                                                                                                                                                                                                                                                                                                                                                                                                                                                                                                 |
|--------------------------------|-----------|-------------------------------------------------------------|---------------------|------------------------------------------------------------------------------------------------------------------|--------|---------------------------------------------------------------------|------------------------------------------------------------------------------------------------------------------------------------------------|----------------------------------------------------------------------------------------------------------------------------------------------------------------------------------------------------------------------------------------------------------------------------------------------------------------------------------------------------------------------------------------------------------------------------------------------------------------------------------------------------------------------------------------------------------|
| <b>Biomarker studies</b>       |           |                                                             |                     |                                                                                                                  |        |                                                                     |                                                                                                                                                |                                                                                                                                                                                                                                                                                                                                                                                                                                                                                                                                                          |
| Raghavan et al., 2018<br>USA   | ASD       | Prospective cohort,<br>Clinical Boston Medical Center Birth | ICD-9               | Maternal blood samples collected 24-72 hours post-delivery<br>Self-reported maternal multivitamin supplement use | NA     | ASD, n=86<br>TD, n=1171                                             | Child: gestational age, sex and year of birth<br>Mother: age, education, parity, BMI, smoking status, diabetes status, race and MTHFR genotype | Plasma B <sub>12</sub> (>600 pmol/L), HR 3.0 (1.6-5.7); ref (≥200-≤600 pmol/L)<br>Plasma B <sub>12</sub> (≥90th percentile), HR 2.5 (1.4-4.5), ref ((≥10th to <90th percentile)<br>Plasma folate at birth (≥60.3 nmol/L), HR 2.5 (1.3-4.6), ref (>14.7 to <60.3)<br>Multivitamin use: First trimester<br>≤ 2/week HR 3.4 (1.6, 7.2), >5/week HR 2.3 (1.2, 3.9)<br>Second trimester<br>≤ 2/week HR 3.8 (1.8, 8.0), >5/week HR 2.1 1.2, 3.6<br>Third trimester<br>≤ 2/week HR 3.5 (1.7, 7.4), >5/week HR 2.1 1.2, 3.6<br>ref: multivitamins 2–5 times/week |
| Egorova et al., 2020<br>Sweden | ASD       | Case-control                                                | ICD-10              | Maternal serum folate concentrations at 14 weeks of pregnancy                                                    | NA     | ASD, n=100 (74-infantile autism, 26-Asperger syndrome)<br>TD, n=100 | Child: sex<br>Maternal: age at sampling, serum cotinine and 5-methyl tetrahydrofolate levels<br>Other: year of sampling                        | Folate, nmol/L<br>OR 1.70 (1.22-2.37)                                                                                                                                                                                                                                                                                                                                                                                                                                                                                                                    |

|                                                |                    |                                       |                           |                                                                                                                                              |                                 |                             |                                                                                                                                                                                                                                                                             |                                                                                                                                                                                                                                                                       |
|------------------------------------------------|--------------------|---------------------------------------|---------------------------|----------------------------------------------------------------------------------------------------------------------------------------------|---------------------------------|-----------------------------|-----------------------------------------------------------------------------------------------------------------------------------------------------------------------------------------------------------------------------------------------------------------------------|-----------------------------------------------------------------------------------------------------------------------------------------------------------------------------------------------------------------------------------------------------------------------|
| Steenweg-de Graaff et al., 2014<br>Netherlands | Autistic traits    | Population-based cohort, Generation R | SRS, CBCL-Parent reported | Maternal plasma folate concentration: median 13.2 weeks of gestation (10.5-17.2 weeks)<br>FA use from preconception to 10 weeks of pregnancy | NA                              | Autistic traits, n=3893     | Child: age, sex, gestational age at venipuncture                                                                                                                                                                                                                            | FA before conception<br>OR -0.04 (-0.07 to -0.02),<br>FA first 10 weeks of pregnancy,<br>OR -0.04 (-0.07 to -0.02)<br>FA after first 10 weeks of pregnancy,<br>OR -0.06 (-0.09 to -0.03)<br>ref no use<br>Folate concentrations, nmol/L<br>B -0.004 (-0.013 to 0.004) |
| Braun et al., 2014<br>USA                      | Autistic behaviors | Population-based cohort, HOME         | SRS-Mother report         | Whole blood folate: 11-21 weeks gestation<br>Prenatal vitamin use: 14-39 weeks gestation                                                     | NA                              | Autistic traits, n=209      | Maternal: age, race, education, prenatal vitamin use, marital status, employment insurance status, depressive symptoms, serum cotinine concentrations<br>food security, fresh fruit/vegetable intake<br>Household: income                                                   | Prenatal vitamin weekly/daily<br>OR 0.26 (0.08-0.89), ref no use<br><br>Folate concentration, nmol/L<br>OR 1.42 (0.81-2.49)                                                                                                                                           |
| <b>Record based</b>                            |                    |                                       |                           |                                                                                                                                              |                                 |                             |                                                                                                                                                                                                                                                                             |                                                                                                                                                                                                                                                                       |
| Moser et al., 2019<br>Israel                   | ASD                | Nested case-control                   | DSM                       | Dispensing record for FA with or without multivitamin supplements one year prior to child's birth                                            | Cumulative FA dose <sup>a</sup> | ASD, n=2009<br>TD, n=19,886 | Child: sex, birth year, birth order<br>Mother: age, region of residence, poverty index, subfertility, number of family physician and obstetric obgyn visits, diabetes mellitus, hypertension, cardiovascular disease, cancer, epilepsy, antifolate medications <sup>b</sup> | FA supplement, ref ≤0.2 mg/day<br>0.2-<0.4mg/day<br>OR 1.27 (0.98-1.65)<br>0.4-<1mg/day<br>OR 1.10 (0.98-1.24)<br>1-<3mg/day<br>OR 1.14 (0.98-1.34)<br>≥3mg/day<br>OR 1.01 (0.60-1.70)                                                                                |

|                                   |     |                                                   |                     |                                                                                                              |                                                  |                                         |                                                                                                                                                   |                                                                                                                                                                                                                                                                                                                                                                                                                                           |
|-----------------------------------|-----|---------------------------------------------------|---------------------|--------------------------------------------------------------------------------------------------------------|--------------------------------------------------|-----------------------------------------|---------------------------------------------------------------------------------------------------------------------------------------------------|-------------------------------------------------------------------------------------------------------------------------------------------------------------------------------------------------------------------------------------------------------------------------------------------------------------------------------------------------------------------------------------------------------------------------------------------|
| Levine et al<br>2018<br>Israel    | ASD | Case-control cohort                               | ICD-9               | Pharmacy records, multivitamins and /or FA supplements before and during pregnancy                           | NA                                               | ASD, n=572<br>Controls, n=45300         | Child: sex, birth year<br>Maternal: parity, SES (high vs low), psychiatric diagnosis at childbirth, age<br>Paternal psychiatric diagnosis and age | FA and/or multivitamin supplements, ref no exposure<br>Before pregnancy (540-271 days before childbirth), RR, 0.39 (0.30-0.50)<br>During pregnancy (270 days before childbirth up to the date of childbirth), RR, 0.27 (0.22-0.33),<br>FA before pregnancy, RR, 0.56 (0.42-0.74)<br>FA during pregnancy, RR, 0.32 (0.26-0.41)<br>Multivitamin before pregnancy, RR 0.36 (0.24-0.52)<br>Multivitamin during pregnancy, RR 0.35 (0.28-0.44) |
| <b>Self-report</b>                |     |                                                   |                     |                                                                                                              |                                                  |                                         |                                                                                                                                                   |                                                                                                                                                                                                                                                                                                                                                                                                                                           |
| Brieger et al.,<br>2021           | ASD | Prospective cohort of high risk families, EARLI   | DSM                 | Multivitamin, prenatal and folic acid intake during pregnancy                                                | FA (<400mcg, 400-1000mcg, >1000mcg) in one month | ASD, n=38<br>Non-ASD, n=153             | Child: sex<br>Maternal: education                                                                                                                 | Prenatal vitamin use, ref no use OR 0.70 (0.32-1.53)<br>Folic acid, ref 400-1000 mcg <400 mcg OR 0.75 (0.32-1.69)<br>>1000 mcg OR 1.64 (0.44-5.47)                                                                                                                                                                                                                                                                                        |
| Tan et al., 2020<br>China         | ASD | Case-control                                      | DSM                 | FA supplementation 12 weeks before and 12 weeks after LMP<br>Micronutrient supplementation from LMP to birth | FA: 400µg daily<br>Micronutrient: NA             | ASD, n=416<br>TD, n=201                 | Child; age, sex, gestational age, birth weight<br>Maternal; residence (rural/urban), labor mode<br>Paternal; age<br>Household: income             | No FA supplementation, OR 1.91 (1.24-2.93),<br>No micronutrient supplements OR 1.721 (1.19-2.47)<br>ref any supplement use                                                                                                                                                                                                                                                                                                                |
| DeVilbiss et al<br>2017<br>Sweden | ASD | Prospective cohort study (Stockholm Youth cohort) | ICD 10<br>DSM-IV-TR | Self-reported multivitamin use during pregnancy                                                              | NA                                               | ASD without ID sibling cohort, n=173209 | Child: sex, birth year, years reside in Stockholm County, socio-economic indicators (education,                                                   | Multivitamin use<br>ASD, OR 0.89 (0.82-0.97)<br>ASD with ID, OR 0.69 (0.57-0.84)<br>ASD without ID, OR 0.94 (0.85-1.03)                                                                                                                                                                                                                                                                                                                   |

|                               |     |                                                  |                                   |                                                                                                               |    |                                                                                       |                                                                                                                                                                                 |                                                                                                                                                     |
|-------------------------------|-----|--------------------------------------------------|-----------------------------------|---------------------------------------------------------------------------------------------------------------|----|---------------------------------------------------------------------------------------|---------------------------------------------------------------------------------------------------------------------------------------------------------------------------------|-----------------------------------------------------------------------------------------------------------------------------------------------------|
|                               |     |                                                  |                                   |                                                                                                               |    | ASD sibling cohort, n=174428<br>ASD with ID, n=169760                                 | family income, maternal birth country)<br>Maternal:(age, BMI, parity, smoking status, medications (antidepressants or antiepileptics), neuropsychiatric conditions <sup>c</sup> | Folic acid supplement ASD, OR 1.27 (1.01-1.60)<br>ASD without ID, OR 1.29 (0.99-1.67)<br>ASD with ID, OR 1.20 (0.71-2.01)                           |
| Surén et al, 2013<br>Norway   | ASD | Prospective cohort MoBa                          | ADI-R<br>ADOS<br>DSM-IV<br>ICD-10 | Self-reported multivitamin, FA supplement 4 weeks before LMP and 8 weeks after LMP                            | NA | ASD, n=114<br>85,176                                                                  | Child: birth year<br>Maternal: planned pregnancy, smoking, BMI, parity, weight gain at 18 and 30 weeks<br>Parental: education, age                                              | FA, OR 0.61 (0.41–0.90),<br>ref no supplement use                                                                                                   |
| Nilsen et al., 2013<br>Norway | ASD | Population based cohort, MoBA                    | ICD-10                            | Self-reported FA intake<br>Before and/or during pregnancy                                                     | NA | ASD, n=234                                                                            | Child; birth year<br>Maternal; age, marital status, parity, hospital size<br>Paternal; age                                                                                      | FA<br>OR 0.86 (0.78, 0.95),<br>ref no supplement use                                                                                                |
| Interview                     |     |                                                  |                                   |                                                                                                               |    |                                                                                       |                                                                                                                                                                                 |                                                                                                                                                     |
| Schmidt et al. 2019<br>USA    | ASD | Prospective cohort of high risk families MARBLES | MSEL<br>ADOS at 3 years of age    | Vitamin and supplement use <sup>d</sup> 6 months preconception and each month during pregnancy                | NA | Siblings of children with ASD- total, n=241<br>ASD, n=55<br>TD, n=126<br>Non-TD, n=60 | Child: birthplace, sex, year of birth<br>Maternal: education, age, pre-pregnancy BMI, planned pregnancy, race/ethnicity, home ownership, insurance delivery type                | Prenatal vitamin<br>RR 0.50 (0.30-0.81),<br>ref, no supplement use<br>Folic acid supplement<br>≥600 µg/day RR 0.51 (0.31-0.82), ref<br>< 600 µg/day |
| Li et al 2018<br>China        | ASD | Retrospective case-control                       | SRS<br>DSM-IV                     | FA supplement use and food preference in preconception and during pregnancy assessed 3–6 years after delivery | NA | ASD, n=374<br>TD, n=354                                                               | Child: age, premature birth, sex<br>Maternal: pre-pregnancy BMI and delivery, premature                                                                                         | FA before pregnancy<br>OR 0.95 (0.61-1.50)<br>FA during pregnancy<br>OR 0.64 (0.41-1.00)<br>ref, no supplement use                                  |

|                              |     |                            |                       |                                                                                      |                                                                             |                                                                               |                                                                                                                                                                                                                            |                                                                                                                                                                                                                                                                                                                                    |
|------------------------------|-----|----------------------------|-----------------------|--------------------------------------------------------------------------------------|-----------------------------------------------------------------------------|-------------------------------------------------------------------------------|----------------------------------------------------------------------------------------------------------------------------------------------------------------------------------------------------------------------------|------------------------------------------------------------------------------------------------------------------------------------------------------------------------------------------------------------------------------------------------------------------------------------------------------------------------------------|
|                              |     |                            |                       |                                                                                      |                                                                             |                                                                               | delivery, intake of other supplements<br>Parental age and education                                                                                                                                                        |                                                                                                                                                                                                                                                                                                                                    |
| Strom et al. 2018<br>Denmark | ASD | Prospective cohort<br>DNBC | ICD-10                | FA use and multivitamin:4-8 weeks of gestation and mid gestation, 25 weeks gestation | FA use 0, <400, ≥400 µg/day                                                 | ASD, n=1234<br>Childhood autism, n=312                                        | Child: sex<br>Maternal: age, parity, smoking, education, SES, planned pregnancy, pre-pregnancy BMI<br>Paternal: age                                                                                                        | Any FA, ref no supplement use<br>At GW 4- 8, HR 1.06, (0 .94- 1.19),<br>Mid pregnancy, <400 µg/day, HR 1.01 (0.76-1.34)<br>400 µg/day, HR 0.98 (CI 0.75-1.29)<br>Folate from food<br>Q2: HR 0.82 (0.67, 1.01),<br>Q3: HR 0.96 (0.78, 1.17),<br>Q4: HR 0.85 (0.69, 1.04)<br>Q5: HR 0.94 (0.77, 1.16) (ref: Q1 quintile)             |
| Virk et al 2016<br>Denmark   | ASD | Prospective cohort<br>DNBC | ICD-10                | Self-reported FA or multivitamin 4 weeks prior LMP and 8 weeks after LMP, 4-8 weeks  | NA                                                                          | ASD, n=552<br>Autistic, n=198<br>Asperger's syndrome, n=109<br>PDD-NOS, n=245 | Child: sex, birth weight, age<br>Maternal: age, smoking, alcohol consumption, mental, pre-pregnancy BMI, parity, mental illness<br>Paternal: age<br>Household: SES                                                         | Folate, ref no use<br>ASD: RR 1.06 (0.82-1.36)<br>Autism: RR 1.18 (0.76-1.84)<br>Asperger's syndrome: RR 0.85 (0.46-1.53)<br>PDD-NOS: RR 1.07 (0.75-1.54)<br>Multivitamin users, ref no use<br>ASD: RR 1.00 (0.82-1.22)<br>Autism: RR 1.22 (0.87-1.69)<br>Asperger's syndrome: RR 0.95 (0.62-1.46)<br>PDD-NOS: RR 0.87 (0.65-1.17) |
| Schmidt et al. 2012<br>USA   | ASD | Case control<br>CHARGE     | MSEL<br>ADI-R<br>ADOS | Self-reported FA and multivitamin intake 3 months before and during pregnancy        | FA intake calculated based on brand, dose, frequency of consumption product | ASD, n=429<br>DD, n=130<br>TD, n=278                                          | Child: birth year, sex, race<br>Maternal: race, age, educational, pre-pregnancy BMI, birthplace, residing with a smoker, smoking status, alcohol consumption, other nutrient intakes (vitamin A, B <sub>6</sub> , C, D, E) | FA, ≥600 µg during first month of pregnancy, OR 0.62 (0.42-0.92)<br>ref <600 µg)<br><br>Among mother and children with MTHFR 677 C>T variant genotypes, OR 0.3 (0.10-0.90)                                                                                                                                                         |

ABC, Autism Behavior Checklist; ADI-R, Autism Diagnostic Interview-Revised; ADOS, Autism Diagnostic Observation Schedule-Generic; ASD, Autism Spectrum Disorder; BMI, Body Mass Index; CARS, Childhood Autism Rating Scale; CBCL, Child Behavior Checklist; DD, Developmental delay; CHARGE, Childhood Autism Risks from Genetics and Environment; DNBC, Danish National Birth Cohort; DSM, Diagnostic and Statistical Manual of Mental Disorders; EARLI, Early Autism Risk Longitudinal Investigation; FA, Folic Acid; HR, Hazard ratio; HOME, Health Outcomes and Measures of the Environment; ICD, International Classification of Diseases; LMP, Last menstrual period; MARBLES, Markers of Autism Risk in Babies: Learning Early Signs; MoBa, Norwegian Mother and Child Cohort Study; MSEL, Mullen Scales of Early Learning; NA, not available; OR Odds ratio; SES, socioeconomic status; SRS, Social Responsiveness Scale; TD, typical development.

<sup>a</sup>Un-supplemented or very low (median daily dispensed dose<0.2mg, typical of dose levels in women not receiving FA supplementation); low-supplemented (0.2 to <0.4 mg/day); typically-supplemented (0.4 to <1 mg/day, reflecting typical dose levels of women supplementing with commonly available prenatal vitamins); high-supplemented (1 to <3 mg/day) and very high supplemented (>3 mg/day, reflecting clinical recommendations for FA supplementation for some high-risk pregnancies).

<sup>b</sup>Antifolate medication (proguanil, methotrexate, sulfasalazine, sulphamethoxazole and trimethoprim, pyrimethamine, valproate, carbamazepine, phenytoin and phenobarbital)

<sup>c</sup>Anxiety disorder, autism, bipolar disorder, depression, epilepsy, intellectual disability, non-affective psychotic disorders, and stress disorders)

<sup>1</sup>includes prenatal, multivitamin, Vit -A, B6, B12, C, D, E, folic acid, iron, calcium, zinc, cereals other supplements: slim fast, instant breakfast, protein powder, brewer's yeast, st.john's worts, ginseng, omega-3 fatty acids, fish oil.

**Table S2.** Odds ratios and 95% CIs for the association between log-transformed maternal serum Vitamin B12 (continuous) and offspring ASD and subtypes adjusting for additional covariates

|                                                             | <b>Model I</b>                                  |                 | <b>Model II</b>                                 |                 |
|-------------------------------------------------------------|-------------------------------------------------|-----------------|-------------------------------------------------|-----------------|
| <b>Log-transformed maternal vitamin B12 levels (pmol/L)</b> | <b>Adjusted<sup>a</sup> Odds Ratio (95% CI)</b> | <b>P- value</b> | <b>Adjusted<sup>b</sup> Odds Ratio (95% CI)</b> | <b>P- value</b> |
| <b>ASD</b>                                                  | 0.93 (0.79-1.09)                                | 0.406           | 0.93 (0.79-1.11)                                | 0.423           |
| <b>Childhood autism</b>                                     | 0.96 (0.72-1.28)                                | 0.764           | 1.00 (0.75-1.35)                                | 0.989           |
| <b>Asperger's</b>                                           | 1.04 (0.77-1.40)                                | 0.794           | 1.00 (0.74-1.36)                                | 0.979           |
| <b>PDD/PDD-NOS</b>                                          | 0.87 (0.66-1.15)                                | 0.339           | 0.86 (0.64-1.15)                                | 0.300           |

ASD, autism spectrum disorder; CI, confidence interval; PDD, Pervasive Developmental Disorder; PDD-NOS, PDD-not otherwise specified.

<sup>a</sup>Adjusted for maternal socioeconomic status, gestational week of blood draw and offspring gestational age.

<sup>b</sup>Adjusted for maternal: history of psychopathology, substance abuse, socioeconomic status, gestational week of blood draw and offspring gestational age.



**Table S3:** Odds ratios and 95% CIs for the association between maternal serum vitamin B12 levels (in quintiles) and offspring ASD and subtypes adjusting for additional covariates

| Maternal serum vitamin B12 in quintiles (pmol/L) | Model I                                      |          | Model II                                     |             |
|--------------------------------------------------|----------------------------------------------|----------|----------------------------------------------|-------------|
|                                                  | Adjusted <sup>a</sup> Odds Ratio<br>(95% CI) | P- value | Adjusted <sup>b</sup> Odds Ratio<br>(95% CI) | P-<br>value |
| <b>1. ASD</b>                                    |                                              |          |                                              |             |
| 0-20 (0-80.8)                                    | 1.06 (0.84-1.33)                             | 0.631    | 1.05 (0.83-1.33)                             | 0.661       |
| 21-40 (80.9-105.4)                               | 1.08 (0.86-1.36)                             | 0.492    | 1.11 (0.88-1.39)                             | 0.388       |
| 41-60 (105.5-128.9)                              | Reference                                    |          | Reference                                    |             |
| 61-80 (128.8-164.9)                              | 1.02 (0.81-1.29)                             | 0.839    | 1.00 (0.79-1.27)                             | 0.981       |
| ≥81 (≥165)                                       | 1.01 (0.80-1.27)                             | 0.943    | 1.03 (0.81-1.30)                             | 0.812       |
| <b>2. Childhood autism</b>                       |                                              |          |                                              |             |
| 0-20 (0-80.8)                                    | 1.49 (0.98-2.27)                             | 0.061    | 1.53 (0.99-2.35)                             | 0.054       |
| 21-40 (80.9-105.4)                               | 1.29 (0.88-1.89)                             | 0.197    | 1.35 (0.91-1.99)                             | 0.141       |
| 41-60 (105.5-128.9)                              | Reference                                    |          | Reference                                    |             |
| 61-80 (128.8-164.9)                              | 0.96 (0.64-1.45)                             | 0.857    | 1.00 (0.66-1.52)                             | 0.996       |
| ≥81 (≥165)                                       | 1.59 (1.06-2.42)                             | 0.027    | 1.75 (1.14-2.67)                             | 0.010       |
| <b>3. Asperger's</b>                             |                                              |          |                                              |             |
| 0-20 (0-80.8)                                    | 0.89 (0.61-1.29)                             | 0.538    | 0.87 (0.59-1.27)                             | 0.468       |
| 21-40 (80.9-105.4)                               | 1.03 (0.69-1.53)                             | 0.877    | 1.02 (0.68-1.53)                             | 0.918       |
| 41-60 (105.5-128.9)                              | Reference                                    |          | Reference                                    |             |
| 61-80 (128.8-164.9)                              | 1.27 (0.84-1.89)                             | 0.255    | 1.19 (0.79-1.82)                             | 0.400       |
| ≥81 (≥165)                                       | 0.99 (0.67-1.47)                             | 0.970    | 0.95 (0.63-1.42)                             | 0.802       |
| <b>3. PDD/PDD- NOS</b>                           |                                              |          |                                              |             |
| 0-20 (0-80.8)                                    | 0.87 (0.56-1.33)                             | 0.511    | 0.86 (0.55-1.34)                             | 0.507       |
| 21-40 (80.9-105.4)                               | 0.93 (0.61-1.40)                             | 0.725    | 0.96 (0.62-1.48)                             | 0.847       |
| 41-60 (105.5-128.9)                              | Reference                                    |          | Reference                                    |             |
| 61-80 (128.8-164.9)                              | 0.88 (0.58-1.35)                             | 0.562    | 0.83 (0.54-1.29)                             | 0.414       |
| ≥81 (≥165)                                       | 0.67 (0.44-1.03)                             | 0.067    | 0.68 (0.44-1.06)                             | 0.086       |

ASD, autism spectrum disorder; CI, confidence interval; PDD, Pervasive Developmental Disorder; PDD-NOS, PDD-not otherwise specified.

<sup>a</sup>Adjusted for maternal socioeconomic status, gestational week of blood draw and offspring gestational age.

<sup>b</sup>Adjusted for maternal: history of psychopathology, substance abuse, socioeconomic status, gestational week of blood draw and offspring gestational age.

**Table S4.** Odds ratios and 95% CI of the association between log-transformed maternal serum Vitamin B12 (continuous, quintiles) and offspring autism with and without Intellectual Disability (ID)

| <b>Maternal serum vitamin B12 (pmol/L)</b> | <b>Association with offspring autism with ID</b>    |                                 |                                       |                 |                                                 |                 |
|--------------------------------------------|-----------------------------------------------------|---------------------------------|---------------------------------------|-----------------|-------------------------------------------------|-----------------|
| <b>Continuous</b>                          | <b>Cases (N=221) Median</b>                         | <b>Controls (N=221) Median</b>  | <b>Odds Ratio Unadjusted (95% CI)</b> | <b>P- value</b> | <b>Odds Ratio Adjusted<sup>a</sup> (95% CI)</b> | <b>P- value</b> |
| Log-transformed analysis                   | 4.75                                                | 4.74                            | 1.05 (0.68-1.61)                      | 0.825           | 1.06 (0.69-1.64)                                | 0.796           |
| <b>Quintiles</b>                           | <b>n (%)</b>                                        | <b>n (%)</b>                    | <b>Odds Ratio Unadjusted (95% CI)</b> | <b>P- value</b> | <b>Odds Ratio Adjusted<sup>a</sup> (95% CI)</b> | <b>P- value</b> |
| 0-20 (0-80.8)                              | 51 (23.08)                                          | 42 (19.00)                      | 1.55 (0.70-3.41)                      | 0.279           | 1.74 (0.77-3.93)                                | 0.187           |
| 21-40 (80.9-105.4)                         | 36 (16.29)                                          | 51 (23.08)                      | 0.67 (0.32-1.39)                      | 0.281           | 0.71 (0.33-1.52)                                | 0.377           |
| 41-60 (105.5-128.9)                        | 46 (20.81)                                          | 40 (18.10)                      | Reference                             |                 | Reference                                       |                 |
| 61-80 (128.8-164.9)                        | 40 (18.10)                                          | 56 (25.34)                      | 0.66 (0.30-1.42)                      | 0.285           | 0.66 (0.30-1.46)                                | 0.308           |
| ≥81 (≥165)                                 | 48 (21.72)                                          | 32 (14.48)                      | 1.63 (0.73-3.64)                      | 0.232           | 1.87 (0.80-4.38)                                | 0.148           |
| <b>Maternal serum vitamin B12 (pmol/L)</b> | <b>Association with offspring autism without ID</b> |                                 |                                       |                 |                                                 |                 |
| <b>Continuous</b>                          | <b>Cases (N=1337) Median</b>                        | <b>Controls (N=1337) Median</b> | <b>Odds Ratio Unadjusted (95% CI)</b> | <b>P- value</b> | <b>Odds Ratio Adjusted<sup>a</sup> (95% CI)</b> | <b>P- value</b> |
| Log-transformed analysis                   | 4.73                                                | 4.76                            | 0.88 (0.74-1.05)                      | 0.149           | 0.92 (0.77-1.10)                                | 0.369           |
| <b>Quintiles</b>                           | <b>n (%)</b>                                        | <b>n (%)</b>                    | <b>Odds Ratio Unadjusted (95% CI)</b> | <b>P- value</b> | <b>Odds Ratio Adjusted<sup>a</sup> (95% CI)</b> | <b>P- value</b> |
| 0-20 (0-80.8)                              | 280 (20.94)                                         | 270 (20.19)                     | 1.54 (0.94-2.52)                      | 0.086           | 1.42 (0.86-2.34)                                | 0.172           |
| 21-40 (80.9-105.4)                         | 292 (21.84)                                         | 262 (19.60)                     | 1.64 (1.04-2.57)                      | 0.033           | 1.58 (0.99-2.49)                                | 0.052           |
| 41-60 (105.5-128.9)                        | 244 (18.25)                                         | 270 (20.19)                     | Reference                             |                 | Reference                                       |                 |
| 61-80 (128.8-164.9)                        | 270 (20.19)                                         | 256 (19.15)                     | 1.23 (0.76-1.99)                      | 0.391           | 1.09 (0.67-1.78)                                | 0.729           |
| ≥81 (≥165)                                 | 251 (18.77)                                         | 279 (20.87)                     | 1.47 (0.91-2.36)                      | 0.112           | 1.49 (0.92-2.43)                                | 0.103           |

CI, confidence interval; Intellectual Disability, ID.

<sup>a</sup>Adjusted for gestational week of blood draw and maternal socioeconomic status.
